# Supplementary material
Source: PubMed Central journal article supplement (PMC2798310)
Supplement: supp_30_1_231__3.pdf [file supp_30_1_231__3.pdf]

ESRAR005[Strab6|34871 025|34871 037|+|GGTGCATGGTTCA/1-73 ... cagtttctctgctgtttccacaagtgttcgaaggtgcatg---gttacccgtggtggccttaaaggtaagtaactctcc

ESRAR020[ter2|8|871 84878|871 84890|+|GGTTCAaAGTTCA/1-73 ... ctaaagaaatcgtgtaagggctgaacgcaggttcaaa---gttcagtaaccgcaactctaccctggtgggccccta

ESRAR026[Sh3bp1|1|5|78728020|78728032|+|GGTTCAaGGTTCA/1-73 ... attacaacatcttttgaagggaatagcgtatggttcaag---cttcagggctttccaccttcaatgattcaacacca

ESRAR056[Phc1|6|1|22291 362|1|22291 374|+|AGGTCaAGGTTAA/1-73 ... acccaacttcattcaaacctagaactttggcaggtcaag---gttaaagctctcttggggagacttacaaaatggcgt

ESRAR074[Rhbhd2|5|1|361 19371|1|361 19383|+|AGGTAaaAGGTC/1-73 ... catccagctgcttgggggttaaggccaataggtaaaa---ggtaaggctgtcttgggtccagagttacgtccaa

ESRAR136[Zfp64|2|1|68785204|1|6878521 6|+|AGGTCaAGGACA/1-73 ... ccccttcttttttcaacttcttaaccttgaaggtcaga---ggacagctcaggtggcttagttggtatctcagga

ESRAR154[Slc35d1|4|1|028881 68|1|028881 80|+|GGGTCaAGGTC/1-73 ... aaagctcttttttggctcacttctccaggggtcaaa---gttcacaaagtaaccaacatgattcaacagtaa

ESRAR166|1|700001 C02Rik|5|30769850|30769862|+|GGGTCaAGGTC/1-73 ... cttttagggcatcaaacgagcctttccaggggtcag---gttcacacactgctgtatcagatgcatctcatt

ESRAR173[Fn1|1|71 69751 6|71 697528|+|AATTCAaGGGTC/1-73 ... tccaaatccagcttcaaacaccagggaatcaatcaag---ggtaacagggacacaaacagtttgaaggttgcg

ESRAR183[Barhl1|2|28771 631|28771 643|+|AGGGCAgGGGTC/1-73 ... cgcagcttctccaggaacaggtagccagggcagg---ggtaagcagggcagtagcaaccggcggggccg

ESRAR010[Hbef-Slc4a9|1|8|3667801 3|36678026|+|GGGTCaAGGTC/1-74 ... gatccacagcatagaaaggttaggggaacagggtcagg---agttcaaggtcatctcactaataatgttaattga

ESRAR012[Atp2a2|5|1|22953294|1|22953307|+|GGATCAaAGGTC/1-74 ... gtgatccacgaacagaagtggaagccagggatcag---agttcaaggtcatggacagacactgaaggagttag

ESRAR018[Calr-Farsa|8|87372208|87372221|+|GGGTCaAGGTC/1-74 ... tcttagtaccagaagcgttgatgaaagcaggggtcaaa---agttcagttcaggtgcatagttgagttgagcca

ESRAR041[BC030867|1|1|021 1 1 208|1|021 1 1 221|+|GGGTCaAGGTC/1-74 ... gcaagtaatcccaactcttgggaagaaaggggtcagg---agttcaaggtcagggctggggaaggtgtagcag

ESRAR075[Gse1|8|1|2301 0796|1|2301 0809|+|GGGTCaAGGTC/1-74 ... gtaactcgggacttaggacctgaggtctgggtcaaa---agttgaccatagttgacagagtcacacaccca

ESRAR131|[Thns2|6|71 099493|71 099506|+|GGTTCAaGGGTC/1-74 ... gttggtgaaagtctctctctccaccaagtgttccaggggtcaaaactcagg---gtaattaggcctaccactgag

ESRAR159[Spred2|1|1|981 9627|1|981 9640|+|AGTTCaAGGTC/1-74 ... aatttgcaatccactgtctctctgttaagagttcaggaggtgca---ggtaaggtcaggtgcatagttgagttgagcca

ESRAR174[NeK2|1|1|93645095|1|936451 08|+|AGGTCaAGGTC/1-74 ... gactcggaaaaggggtgggtcacaagtggaaaggtcaaa---aggtcaggtgtctccagtcacagagcctcggacatccg

ESRAR007[Mcart1|4|45420691|45420707|+|GGGTCaAGGTC/1-77 ... tcagcaggtctgagtcagcatacaaaaccagggtcaggcagggt---gtaaggtctagttacagcaggatttaccactg

ESRAR045[Ctsd|7|1|4957871 8|1|49578734|+|GGGTCaAGGTC/1-77 ... ggagccccatttctcactgctatgtagcaggtgcaagcagaggt---gtaaggtctaggtgcatagttggtctcagctcag

ESRAR059[Mry1|2|1|1 5895501|1|1 589551 7|+|GTGTCaAGGTC/1-77 ... ttttaacagggctgaaaatttctactctgctggtcacaattgggt---gtaatttgggttagagttctcagttctcag

ESRAR059[Mry1|2|1|1 589551 2|1|1 5895528|+|GGGTCaAGGTC/1-77 ... gttaaaatttctacttctgctggttcaaatgggggtcattttgggt---gtaatttgggttagagttctcagttctcag

ESRAR109[Ebf4|2|1|301 20488|1|301 20504|+|AGGTTAaAGGTC/1-77 ... gttagagacccttaagcgttaagcgcggagggttaagcagaggt---gtaaggtcaggtcaggtgtagcagctctaga

ESRAR124[Mdk|2|91 772847|91 772863|+|AGGTCaAGGTC/1-77 ... caggcctgtgagccttaagccttagcagaggtcaggatcgggg---gtaaggtcaggtcaggtgtagcagctctaga

ESRAR131|[Thns2|6|71 099501|71 09951 7|+|GGGTCaAGGTC/1-77 ... aagctctctctccaccaagtgttccaggggtcaaaactcagg---gtaatttgggttagagttctcagttctcag

ESRAR142[Rab20|9|1|1 48031 3|1|1 480329|+|AGTTCaAGGTC/1-77 ... gaggcagagggcagagggcagacagatctctgaggtcaggcca---gtaaggtctacagagttgagttccaaagacgcca

ESRAR145[D1 4Erd436e|1 4|481 92948|481 92964|+|AGTTCaAGGTC/1-77 ... aatatacaaaaaccactgtgttcttggcaggtcaccctta---gtaaggtctacagagttgagttccaaagacgcca

ESRAR148[Rbpm5|8|3503971 9|35039735|+|AGGTCaAGGTC/1-77 ... gctcagaccctctctggtcccaatctctgaggtcaccgggag---gtaaggtctacagagttgagttccaaagacgcca

ESRAR159[Spred2|1|1|981 9635|1|981 9651|+|AGTTCaAGGTC/1-77 ... tcccaactgtctctgttaaaagagttcaggaggtcaccaca---gtaaggtctacagagttgagttccaaagacgcca

ESRAR160[Zfp770|2|1|1 4026752|1|1 4026768|+|GGGTCaAGGTC/1-77 ... teatctgtctgtcaagtaaggagcttgcaggggtcagccgag---gtaaggtctacagagttgagttccaaagacgcca

ESRAR176[Lrrc6|1|6|4850291 7|48502933|+|GGGTCaAGGTC/1-77 ... ggtataaggggtgggaaaaatccagaaaaggtcagacaggg---gtaaggtctacagagttgagttccaaagacgcca

ESRAR178[Lg2|5|52956622|52956638|+|AGGTCaAGGTC/1-77 ... cttagcatttcttagcctgctgaggtgtagaggtcaggaggg---gtaaggtctacagagttgagttccaaagacgcca

ESRAR180[tdh3b|2|1|301 09999|1|301 1 001 5|+|AGGTCaAGGTC/1-77 ... gacgycgagcaccgctgagacagacaaaggtcagatcgggga---gtaaggtctacagagttgagttccaaagacgcca

ESRAR181|[Agpat3|1|0|7781 5998|7781 601 4|+|GGGTCaAGGTC/1-77 ... ctatgccaggtctctcttaggtcagccttgggtcagaagaag---gtaaggtctacagagttgagttccaaagacgcca

ESRAR181|[Agpat3|1|0|7781 5976|7781 5992|+|GGGTCaAGGTC/1-77 ... ctatgccaggtctctcttaggtcagccttgggtcagaagaag---gtaaggtctacagagttgagttccaaagacgcca

ESRAR181|[Agpat3|1|0|7781 5998|7781 601 4|+|GGGTCaAGGTC/1-77 ... ctatgccaggtctctcttaggtcagccttgggtcagaagaag---gtaaggtctacagagttgagttccaaagacgcca

ESRAR181|[Agpat3|1|0|7781 5998|7781 6003|+|GGGTCaAGGTC/1-77 ... ctatgccaggtctctcttaggtcagccttgggtcagaagaag---gtaaggtctacagagttgagttccaaagacgcca

ESRAR197[Arf4|1|4|27457324|27457340|+|AGGTCaAGGTC/1-77 ... gactgggaaaccaccagggctccctgaaaggtcaccagaggt---gtaaggtctacagagttgagttccaaagacgcca

ESRAR211|[B630005N1 4Rik|6|1|3628452|1|3628468|+|GGGTCaAGGTC/1-77 ... caaggagtcacaacttgaagccttctcaggggtcaggagag---gtaaggtctacagagttgagttccaaagacgcca

ESRAR020[ter2|8|871 851 77|871 851 89|+|GGTTAaAGGTC/1-73 ... tggcttgcctccctgggtgggggaggggtgggtttag---gggtcagccgtccctaaagcctccggaactgggttg

ESRAR032[Masp2|4|1|47974773|1|47974785|+|GGTTCAaAGGTC/1-73 ... aagtcaacttggggaactaacgacctatagggttcaata---ggttagaggttactggcaaggggtggtgcttca

ESRAR043[A4301 07D22Rik|1 7|32530272|32530284|+|ATGTCaAGGTC/1-73 ... atagccagagttcaagattgggttagcaggtcagtcagaa---ggttagaggttactggcaaggggtggtgcttca

ESRAR044|[Wiz1|7|32529843|32529855|+|AGGTCaAGGTC/1-73 ... gggatagaagtcaggacaggtctctcaaaagtcata---ggtcaattctgtcttaagaggattctaaaggtg

ESRAR044|[Wiz1|7|32529920|32529932|+|AGGTCaAGGTC/1-73 ... ggaatcaaatattgaaaggaatggaccaaggtcaga---agtcagagccaaagctagagaggggaaaaagatta

ESRAR088|[Ints3|3|90241 257|90241 269|+|AGGTCaAGGTC/1-73 ... ggggtggcaactctactctgactctggtgggaggtgaggggtcaga---agtcagaggttactggcaaggggtggtgcttca

ESRAR096|[Mohp|9|1|20060858|1|20060870|+|GGGTCaAGGTC/1-73 ... gtggcagagtagcttgcctgctgcaaaagttagggctcga---ggtcaggttcccagcaccacagccagggcaggtgga

ESRAR138[G0s2|1|1|951 01 432|1|951 01 444|+|GGGTCaAGGTC/1-73 ... tgcctgcttaggcaactgacagcaagcttagtgggtcagggtcagg---gtaaggtctacagagttgagttccaaagacgcca

ESRAR145[D1 4Erd436e|1 4|481 92987|481 92999|+|GGGTCaAGGTC/1-73 ... atgtggagaggttcaggggtgtagaggtcagggtcaga---ggttagaggttactggcaaggggtggtgcttca

ESRAR145[D1 4Erd436e|1 4|481 92994|481 93006|+|AGGTCaAGGTC/1-73 ... atgtggagaggttcaggggtgtagaggtcagggtcaga---ggttagaggttactggcaaggggtggtgcttca

ESRAR188[Stk1|1|0|79577985|79577997|+|GGGTCaAGGTC/1-73 ... ccagcctgtctcttaacggccttgggggaggggtcaaa---ggtcaaaaagtagcccaaggtcagactcccgaa

ESRAR191|[Gmn1|3|24853950|24853962|+|AGGTCaAGGTC/1-73 ... ttggagccggaagcggagggtcagacggcaaggtcaga---gggacacactcctaaggcaagaggaaactcgggt

ESRAR192|[Cln8|8|1|4887422|1|4887434|+|GGGTCaAGGTC/1-73 ... ccttggccaggtggagataggaaaggtcagg---ggttaaggtcactctcaggggaagggagttgattttaaggtca

ESRAR192|[Cln8|8|1|4887429|1|4887441|+|AGGTCaAGGTC/1-73 ... atactgaccttggccaggtggagataggaaaggtcagg---ggttaaggtcactctcaggggaagggagttgatttta

ESRAR020[ter2|8|871 851 77|871 851 90|+|GGGTCaAGGTC/1-74 ... ctggcttgcctccctgggtgggggaggggtgggtttag---gggtcagccgtccctaaagcctccggaactgggttg

ESRAR032[Masp2|4|1|47974939|1|47974952|+|GGGTCaAGGTC/1-74 ... tctgtcaagagggggaaggagactcaggggtcagc---agttcaggggaaatgggcaactctcttctctca

ESRAR033[Spc25|2|69047928|69047941|+|GGGTCaAGGTC/1-74 ... atgtcagcactctggaactctgagtcaggggtcaca---agttcaggtcagctgagcaatgtggcaccagga

ESRAR038|[Mc1|3|95457336|95457349|+|AGGTCaAGGTC/1-74 ... ttggggctggaagagactctctttagaggtcctg---agttcaattcccagcaaccacatggtgctcacaac

ESRAR066|[Fgf1|1|8|39082800|3908281 3|+|AGGTCaAGGTC/1-74 ... cagctgactaagatttggctgggccaagaacaaggtcaaa---aggtcaaggtgagattaggaaggtctctctctct

ESRAR088|[Ints3|3|90241 249|90241 262|+|GGGTCaAGGTC/1-74 ... acactctactctgactctggtgggaggtgaggggtcaga---agtcagaggttactggcaaggggtggtgcttca

ESRAR090|[Akap1|1|1|88726731|88726744|+|GGATCAaAGGTC/1-74 ... atgccaacacttagggaggtggagcagggaggtcagg---agtcagaggtcagcttagaacttcccagcttagg

ESRAR106|[Dusp4|9|35872449|35872462|+|GGGTCaAGGTC/1-74 ... atcaacagcagcgttccccagcagctgacgggtcaaa---gttcaggaacaactcgggagaaacaagccccccg

ESRAR113|[Nfib|4|821 55301|821 5531 4|+|GGGTCaAGGTC/1-74 ... acactgcaagttctgcaagcttgcctccgggtcaga---aggtcaatctgctcttttgggttttagcttttaaac

ESRAR151|[Alkbh7|1|7|571 36568|571 36581|+|AGGTCaAGGTC/1-74 ... gaggctgaggttcagctgggggcaagccaaaggttaga---agttcaatcagcttagcgaatattagccttctca

ESRAR192|[Cln8|8|1|4887428|1|4887441|+|AGGTCaAGGTC/1-74 ... atactgaccttggccaggtggagataggaaaggtcagg---ggttaaggtcactctcaggggaagggagttgatttta

ESRAR199|[Sal1|2|4|52950888|52950901|+|AGGTCaAGGTC/1-74 ... caaggattctacttttgaatctccgaagggaggtcagg---aggtcaaatggagaggttaaaaaagagaaaaaaa

ESRAR001|[Tect1|5|1|2271 9342|1|2271 9358|+|AGGTCaAGGTC/1-77 ... ggttggcaagatgaggaaacttctctctataggtcacttgg---ggtcagaaagaaatgggctatttgaggtggtg

ESRAR009|[C1 qa|4|1|36454074|1|36454090|+|GGGTCaAGGTC/1-77 ... gtgtgggttttagggctggggctagggctagggtcagg---ggtcaggtcagggctagggctagggctagggat

ESRAR018|[Calr-Farsa|8|873721 06|873721 22|+|AGGTCaAGGTC/1-77 ... gtcaagttgacaggaactggaggaggggtcaggtcaggtcag---gtgtcaagatcagtttgaacttgggtgtctc

ESRAR019|[Plekhh1|7|1|0781 1 909|1|0781 1 925|+|GGTTCaAGGTC/1-77 ... tctagtagatggagacagctgtgtcagccggttcaactag---gttcaaggtcagctgaaacgcaatggcagagc

ESRAR023|[Oxnd1|1|4|328991 95|328992 1|+|GAGTCaAGGTC/1-77 ... acctcaggaagaactcctaagcagccaaaggtcactcagag---gttcaaggtcagctgaaacgcaatggcagagc

ESRAR024|[Dph3-Oxnd1|1|4|328991 95|328992 1|+|GAGTCaAGGTC/1-77 ... acctcaggaagaactcctaagcagccaaaggtcactcagag---gttcaaggtcagctgaaacgcaatggcagagc

ESRAR026|[Sh3bp1|1|5|78727947|78727963|+|GGGTCaAGGTC/1-77 ... taatcccaagtttttggcttagtaaatgctgggtcaggct---ggtcaggtcagctgaaacgcaatggcagagc

ESRAR027|[1 81 0055E1 2Rik|1 9|60886853|60886869|+|GGGTCaAGGTC/1-77 ... atccatctcttggccctgttctttagctaggggtcaggtcag---gttcaaggtcagctgaaacgcaatggcagagc

ESRAR029|[BC048679|7|88642273|88642289|+|AGGTCaAGGTC/1-77 ... atgatgatctctctgacttggagcagaggtcagggaggt---gttcaaggtcagctgaaacgcaatggcagagc

ESRAR032|[Masp2|4|1|47974809|1|47974825|+|GGTTCaAGGTC/1-77 ... actggacctctctgaggtccaaagccaaaggttcaactaa---gttcaaggtcagctgaaacgcaatggcagagc

ESRAR042|[Tmeff1|4|48592996|4859301 2|+|GGGTCaAGGTC/1-77 ... agggatctaggggttgagaagggagcaaggtcagggaggt---gttcaaggtcagctgaaacgcaatggcagagc

ESRAR043|[A4301 07D22Rik|1 7|325301 24|325301 40|+|AGGTCaAGGTC/1-77 ... gacaagatgttaggaaggtcagagagcaggtcaggtcag---gttcaaggtcagctgaaacgcaatggcagagc

ESRAR046|[Atpbp1|1|1|596591 1 6|596591 32|+|GGGTCaAGGTC/1-77 ... ceatgcccacagcctcacaagccttcttgggtcacttgg---gttcaaggtcagctgaaacgcaatggcagagc

ESRAR049|[Rbks-Bre|5|32000007|32000023|+|GGGTCaAGGTC/1-77 ... aaggagcagggggggcctccttgggttacgggtcaggca---gttcaaggtcagctgaaacgcaatggcagagc

ESRAR052|[Cxcr7|1|92089063|92089079|+|GGGTCaAGGTC/1-77 ... tagcatcagcagggacctctgaggtcaggtcagaaaggt---gttcaaggtcagctgaaacgcaatggcagagc

ESRAR053|[Mrp137-281 041 0C1 4Rik|4|1|0674021 8|1|06740234|+|AGTTCaAGGTC/1-77 ... gtcaagcaactgctctagaaagcagggaggttcaagggc---gttcaaggtcagctgaaacgcaatggcagagc

ESRAR057|[Pd3c1|1|39044279|39044295|+|GGGTCaAGGTC/1-77 ... gtagcccgatcagtaggataaaagtgaccgggtcagctg---gttcaaggtcagctgaaacgcaatggcagagc

ESRAR058|[Gtpbp4|1|3|8995862|8995878|+|ATGTCaAGGTC/1-77 ... gtgtggggcagaggttttctcagggcccaatgctcaggt---gttcaaggtcagctgaaacgcaatggcagagc

ESRAR066|[Fgf1|1|8|39082808|39082824|+|GGGTCaAGGTC/1-77 ... tttttgctgtcagctgactaagatttggctgggccaagaa---gttcaaggtcagctgaaacgcaatggcagagc

ESRAR071|[Rbm41 X|1|365381 43|1|365381 59|+|AGTTCaAGGTC/1-77 ... gcatgatattttaactactagcctcgaagttcttgggaag---gttcaaggtcagctgaaacgcaatggcagagc

ESRAR087|[Trh|6|921 9541 7|921 95433|+|GGGTCaAGGTC/1-77 ... tcaaaccttggagcttggctgggaagcaggggtcaaac---gttcaaggtcagctgaaacgcaatggcagagc

ESRAR094|[2200001 11 5Rik|1 4|351 68207|351 68223|+|AGGTCaAGGTC/1-77 ... tgettcatgaccaggtgaaacttgcctggtgaggtcagg---gttcaaggtcagctgaaacgcaatggcagagc

ESRAR117|[261 0027C1 5Rik|4|1|25824745|1|25824761|+|GGTTCaAGGTC/1-77 ... tgcagaccagcctctccaaagcccttgggttcaagtag---gttcaaggtcagctgaaacgcaatggcagagc

ESRAR127|[D430039N05Rik|2|83655084|836551 00|+|AGGTCaAGGTC/1-77 ... aaaggttgggttagaccaccctcacttgggtcacaatga---gttcaaggtcagctgaaacgcaatggcagagc

ESRAR129|[Lefty1|1|1|82863953|1|82863969|+|AGGTCaAGGTC/1-77 ... gacagctgctctctcctcctcctcctcctcctcctcct---gttcaaggtcagctgaaacgcaatggcagagc

ESRAR130|[Tmprss6|1|5|78302507|78302523|+|GGGTCaAGGTC/1-77 ... atcccttgcctggccgggtgaaatgctgcaaggtcacta---gttcaaggtcagctgaaacgcaatggcagagc

ESRAR138|[G0s2|1|1|951 01 421|1|951 01 437|+|GGGTCaAGGTC/1-77 ... taggcactgacagcaagcttagtgggtcaggggtcagg---gttcaaggtcagctgaaacgcaatggcagagc

ESRAR189|[Pbx2|1|7|34729908|34729924|+|GGGTCaAGGTC/1-77 ... agccaaagatagggccagagttgactgtaggggtcagca---gttcaaggtcagctgaaacgcaatggcagagc

ESRAR192|[Cln8|8|1|4887392|1|4887408|+|AGTTCaAGGTC/1-77 ... tcaggggttaaggtcactctcagggaaaggtttagattta---gttcaaggtcagctgaaacgcaatggcagagc
