# Supplementary material
Source: PubMed Central journal article supplement (PMC2798310)

MEFs

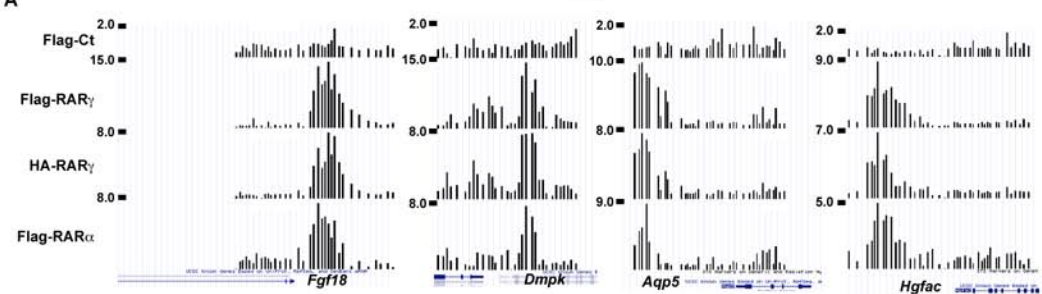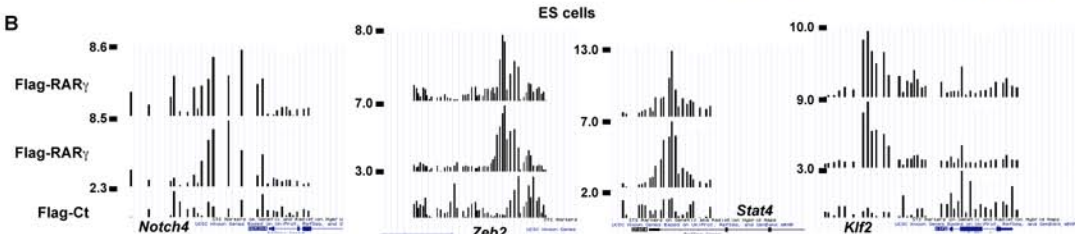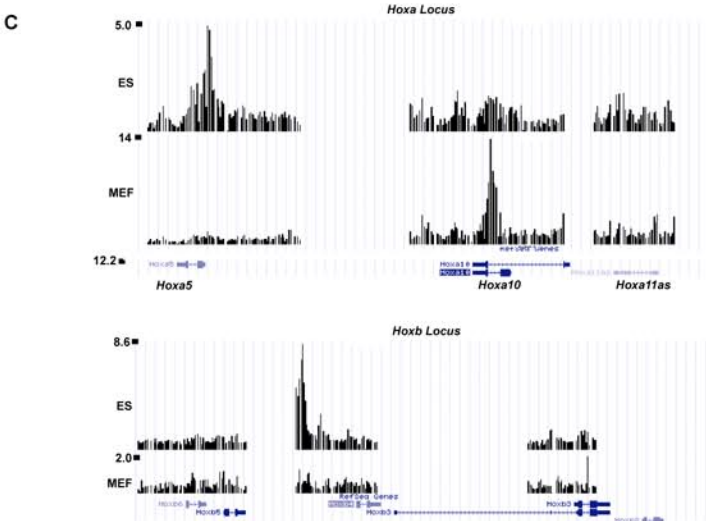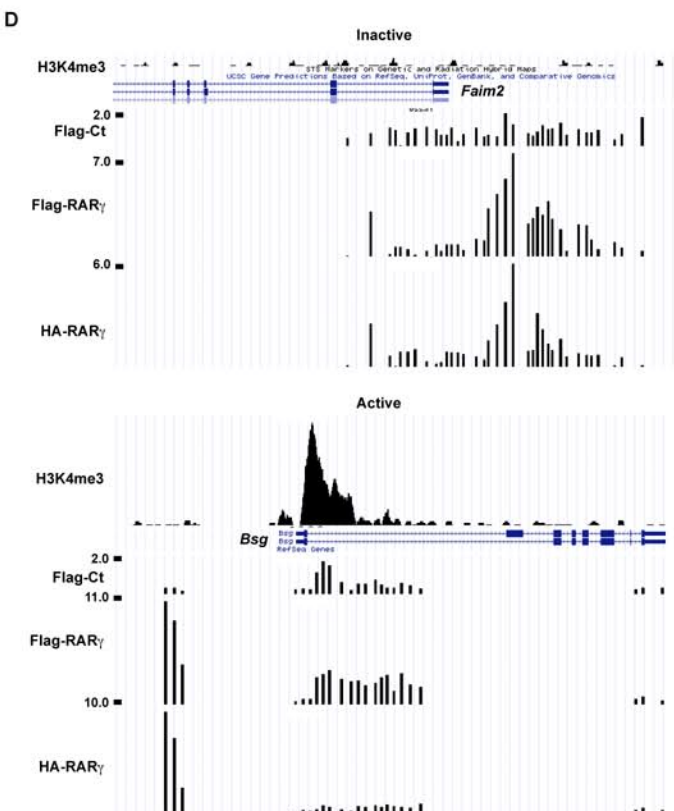

Supplement: supp_30_1_231__1.pdf [file supp_30_1_231__1.pdf]
